# Supplementary material for: A family of luminescent metal–organic frameworks: synthesis, structure, and sensing studies
Source: Royal Society of Chemistry journal article supplement (doi:10.1039/d0ma00889c), 2021-01-01
Supplement: d0ma00889c1.pdf [file d0ma00889c1.pdf]

Supporting information for

**A Family of Luminescent Metal-Organic Frameworks: Synthesis,  
Structural, and Sensing Studies**

**Synthesis of BPEB ligand [C<sub>20</sub>N<sub>2</sub>H<sub>20</sub>]:** Powdered anhydrous zinc chloride (13.64 g, 100.06 mmol) was added to a solution of 4-methylpyridine (13.7 g, 147.1 mmol) and Terephthalaldehyde (6.7 g, 50 mmol) in 40 ml of acetic anhydride, and the mixture was heated for 24 h under reflux, cooled to 70°C, and filtered. The precipitate was washed with acetic anhydride and ethanol to obtain 11 g of the crude product which was recrystallized from pyridine. Yield 6.6 g (46%), yellowish powder.

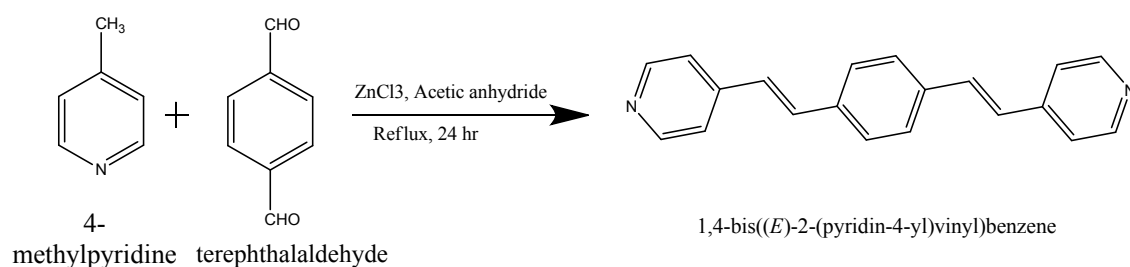

**Scheme 1:** Synthesis of BPEB ligand

**Table S1:**  
Selected bond lengths (Å) and bond angles (deg)

| 1         | 2         | 3         |           |            |           |
|-----------|-----------|-----------|-----------|------------|-----------|
| Co1-O1    | 2.0246    | Zn1-O1    | 2.016(8)  | Co2-O9     | 1.944(0)  |
| Co1-O5    | 2.0352    | Zn1-O2    | 2.031(2)  | Co2-O2     | 1.981(4)  |
| Co1-O3    | 2.0392    | Zn1-O2    | 2.0426    | Co2-O6     | 2.003     |
| Co1-N1    | 2.05393   | Zn1-O3    | 2.0451    | Co2-N1     | 2.037(4)  |
| Co1-O2    | 2.1022    | Zn1-O4    | 2.0733    | Co2-O7     | 2.432(4)  |
|           |           |           |           | Co1-O1     | 2.005(1)  |
| O1-Co1-O5 | 91.61(1)  | N1-Zn1-O4 | 100.14(4) | Co1-O10    | 2.037(4)  |
| O1-Co1-O3 | 89.16(8)  | N1-Zn1-O1 | 104.04(8) | Co1-O5     | 2.074(4)  |
| O1-Co1-N1 | 104.44(6) | N1-Zn1-O3 | 100.01(5) | Co1-N2     | 2.111(9)  |
| O1-Co1-O2 | 163.55(9) | N1-Zn1-O2 | 96.35(1)  | Co1-O4     | 2.206(1)  |
| O5-Co1-O3 | 164.19(2) | O4-Zn1-O1 | 90.24(0)  | Co1-O6     | 2.396(0)  |
| O5-Co1-N1 | 97.37(0)  | O4-Zn1-O3 | 159.67(7) | Co1-C34    | 2.479(5)  |
| O5-Co1-O2 | 87.49(1)  | O4-Zn1-O2 | 87.53(0)  | O9-Co2-O2  | 87.49(1)  |
| O3-Co1-N1 | 97.72(1)  | O1-Zn1-O3 | 87.36(6)  | O9-Co2-O6  | 97.72(1)  |
| O3-Co1-O2 | 87.32(0)  | O1-Zn1-O2 | 159.55(1) | O9-Co2-N1  | 87.32(0)  |
| N1-Co1-O2 | 91.94(4)  | O3-Zn1-O2 | 87.71(3)  | O9-Co2-O7  | 91.94(4)  |
| N1-Co1-O3 | 86.2(1)   |           |           | O2-Co2-O6  | 86.2(1)   |
| N1-Co1-O4 | 86.61(9)  |           |           | O2-Co1-N1  | 85.67(8)  |
| N1-Co1-N4 | 177.5(1)  |           |           | O2-Co2-O7  | 58.39(8)  |
|           |           |           |           | O6-Co2-N1  |           |
|           |           |           |           | O6-Co2-O7  |           |
|           |           |           |           | N1-Co2-O7  |           |
|           |           |           |           | O1-Co1-O10 | 103.15(0) |
|           |           |           |           | O1-Co1-O5  | 161.76(6) |
|           |           |           |           | O1-Co1-N2  | 88.56(4)  |
|           |           |           |           | O1-Co1-O4  | 101.96(9) |
|           |           |           |           | O1-Co1-O6  | 82.93(5)  |
|           |           |           |           | O1-Co1-C34 | 131.90(3) |

|             |           |
|-------------|-----------|
| O10-Co1-O5  | 93.58(8)  |
| O10-Co1-N2  | 92.73(7)  |
| O10-Co1-O4  | 154.85(3) |
| O10-Co1-O6  | 95.84(0)  |
| O10-Co1-C34 | 124.50(7) |
| O5-Co1-N2   | 97.92(5)  |
| O5-Co1-O4   | 61.35(2)  |
| O5-Co1-O6   | 88.27(4)  |
| O5-Co1-C34  | 30.92(2)  |
| N2-Co1-O4   | 89.04(2)  |
| N2-Co1-O6   | 169.09(0) |
| N2-Co1-C34  | 94.74(9)  |
| O4-Co1-O6   | 86.06(0)  |
| O4-Co1-C34  | 30.44(7)  |
| O6-Co1-C34  | 85.94(2)  |

**Table S2:** MOFs reported by using *bpeb* is one of the linkers.

| Compound                                                            | Photoluminescence study                | Thermal stability |
|---------------------------------------------------------------------|----------------------------------------|-------------------|
| $\{[\text{Co}(\text{bpeb})(\text{hfipbb})_{0.5}]\}_n[\text{LCo-1}]$ | 340 nm on <sub>ex</sub> at 391-392 nm. | 295°C             |
| $\{[\text{Zn}(\text{bpeb})_2(\text{hfipbb})]\}_n[\text{LZn-1}]$     | 340 nm on <sub>ex</sub> at 391-392 nm. | 295°C             |
| $\{[\text{Co}(\text{bpeb})_2(\text{oba})]\}_n[\text{LCo-2}]$        | 391 nm on <sub>ex</sub> at 411 nm.     | 375°C             |

*bpeb* = [1,4-bis[2-(4-pyridyl) ethynyl] benzene, *hfipbb* = 4,4'-(Hexafluoroisopropylidene) bis (benzoic acid) and *oba* = 4,4'-Oxybis(benzoic acid).

**Fluorescence experiments:** In the typical experimental setup, 1 mg of each compound was dispersed in 1 ml of MeOH. In a 1 cm quartz cuvette, 3 mL solution of each compound in

MeOH was placed and the fluorescence response upon excitation at 350 nm was measured in-situ after incremental addition of freshly prepared analyte solutions in the range of 365-600 nm while keeping 2 nm slit width for both source and detector. To maintain homogeneity, the solution was stirred at a constant rate during the experiment.

**The formula for calculating the percentage of Picric acid fluorescence intensity quenching:**

$$\frac{(I_0 - I)}{I_0} \times 100\%$$

Where  $I_0$  = initial fluorescence intensity,

$I$  = intensity of 1 containing PA solution.

Reference: (a) S. Pramanik, C. Zheng, X. Zhang, T. J. Emge, and J. Li, J. Am. Chem. Soc., 2011, **133**, 4153; (b) D. Banerjee, Z. Hu and J. Li, Dalton Trans., 2014, **43**, 10668.

**Stern-Volmer equation:**

$$I_0/I = KSV[A] + 1$$

Where  $I_0$  = fluorescent intensity of 1 before the addition of the analyte

$I$  = fluorescent intensity after the addition of the respective analyte

$KSV$  = Stern-Volmer constant

$[A]$  = molar concentration of the analyte (M<sup>-1</sup>).

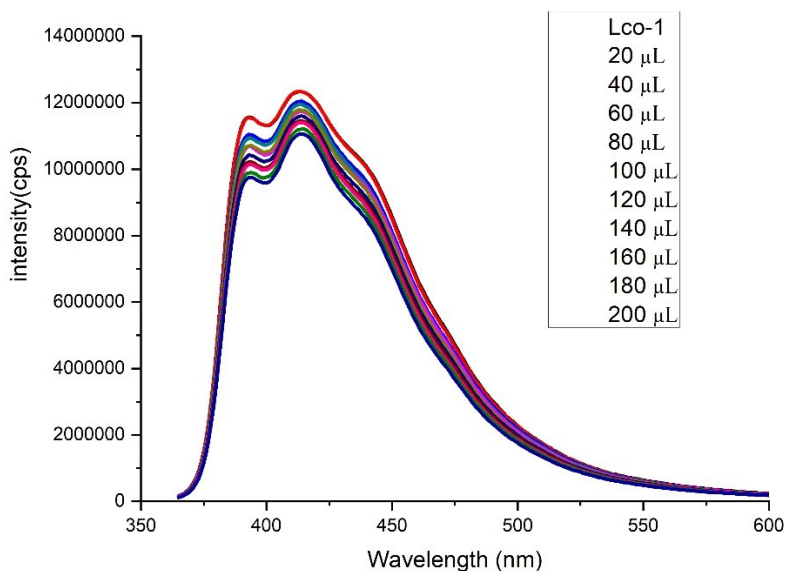

Figure S1: The change in fluorescence intensity of compound 1 upon incremental addition of 1,2-DNB(1mM) solution in DMF

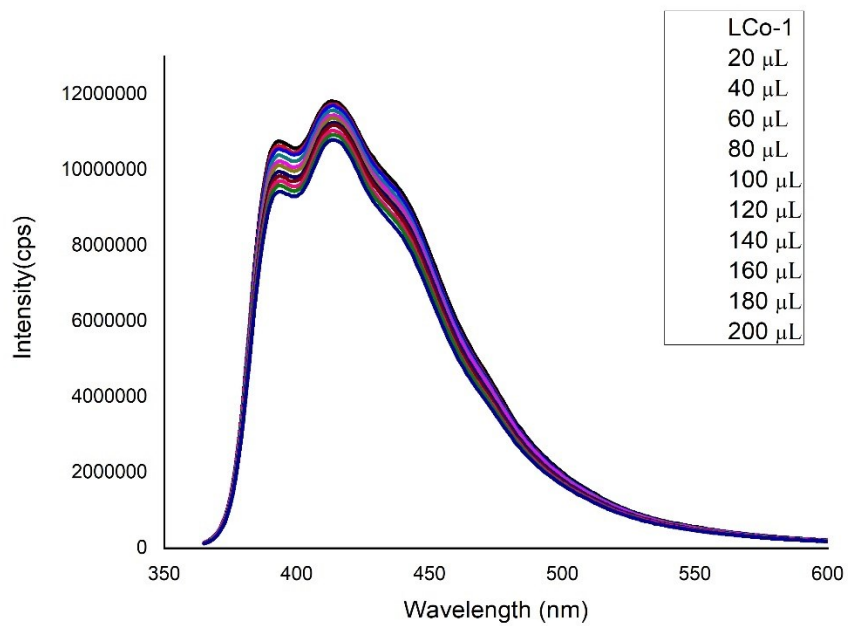

Figure S2: The change in fluorescence intensity of compound 1 upon incremental addition of 1,3-DNB(1mM) solution in DMF

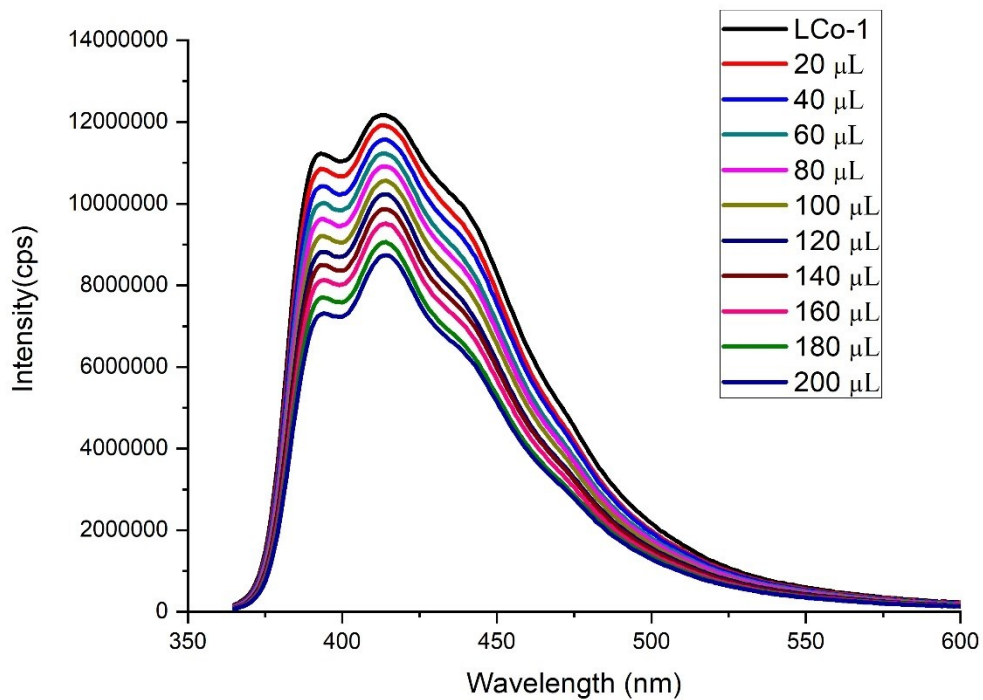

Figure S3: The change in fluorescence intensity of compound 1 upon incremental addition of CDNB(1mM) solution in DMF

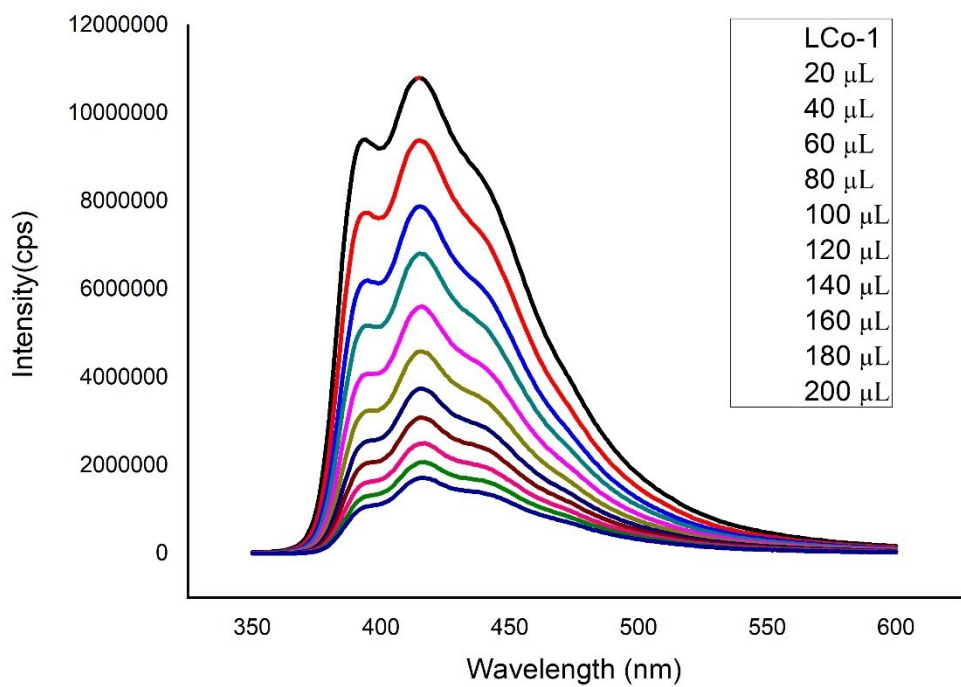

Figure S4: The change in fluorescence intensity of compound 1 upon incremental addition of 2,4-DNPH (1mM) solution in DMF

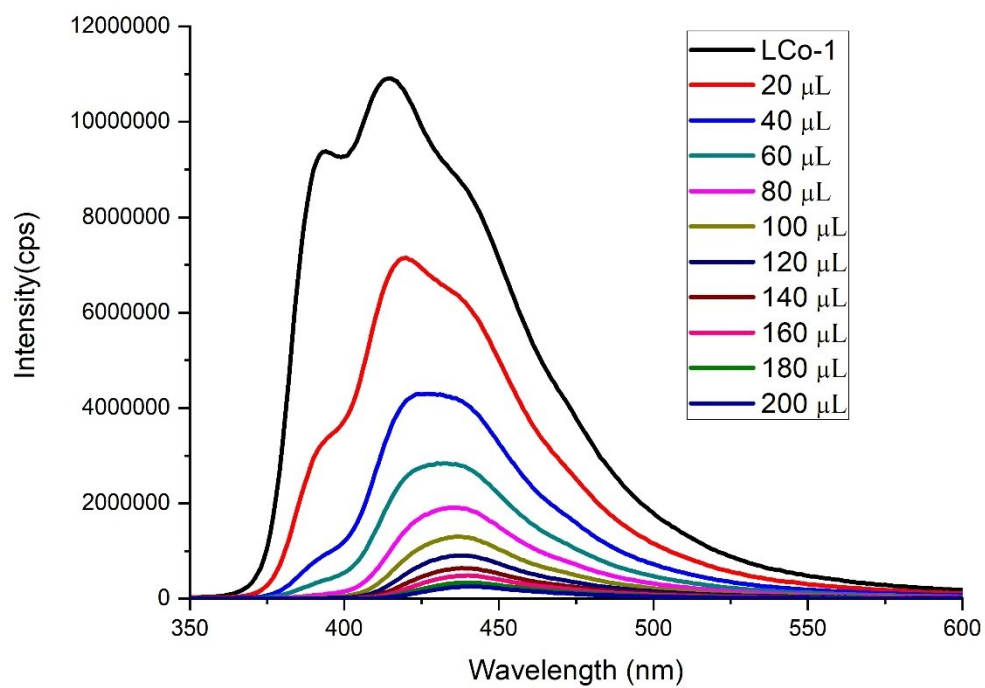

Figure S5: The change in fluorescence intensity of compound 1 upon incremental addition of 4-NA (1mM) solution in DMF

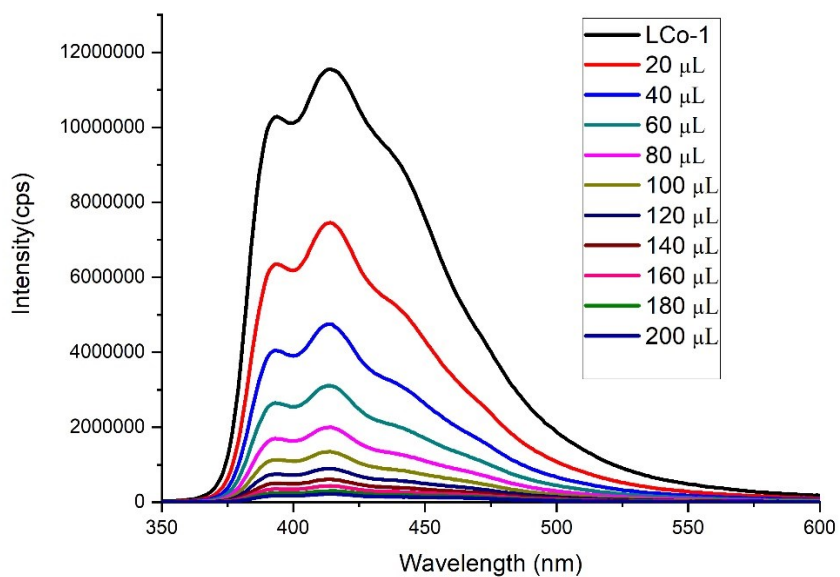

Figure S6: The change in fluorescence intensity of compound 1 upon incremental addition of 1-NP (1mM) solution in DMF

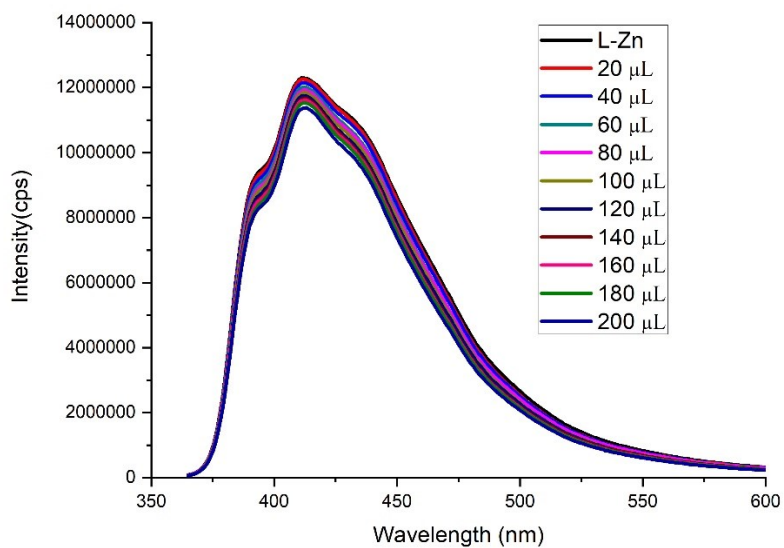

Figure S7: The change in fluorescence intensity of compound 2 upon incremental addition of 1,2-DNB (1mM) solution in DMF



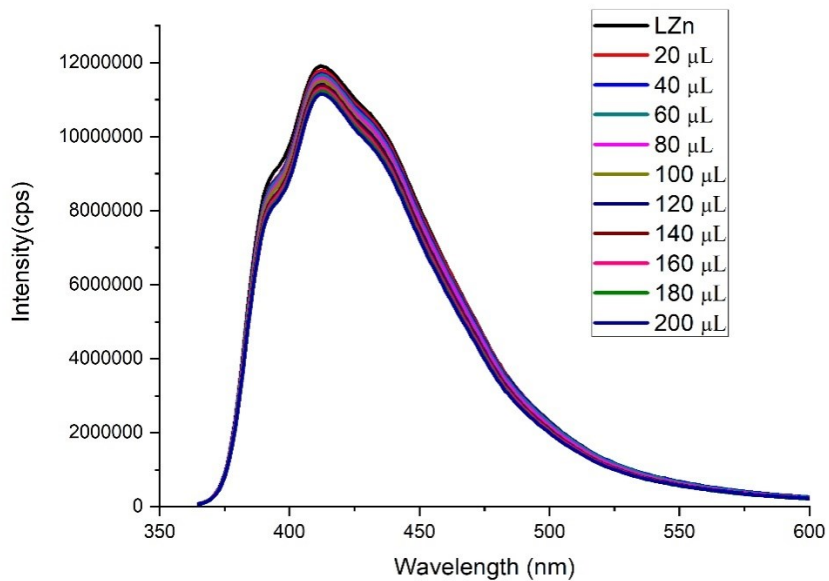

Figure S8: The change in fluorescence intensity of compound 2 upon incremental addition of 1,3-DNB (1mM) solution in DMF

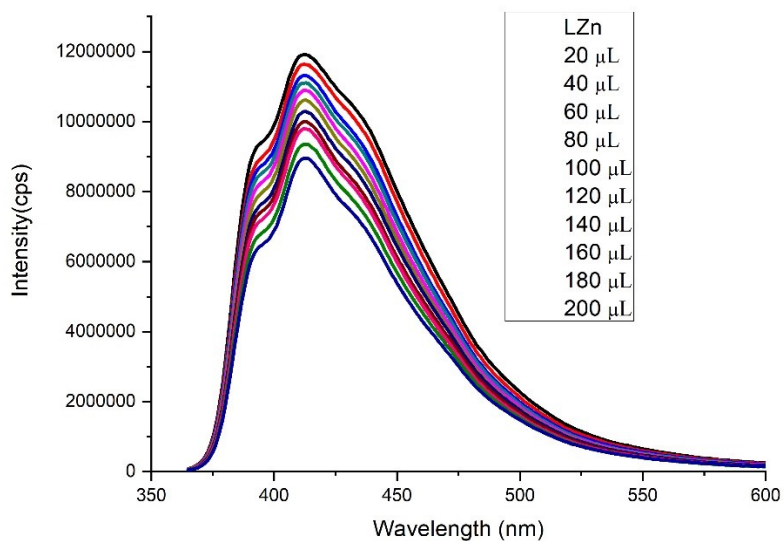

Figure S9: The change in fluorescence intensity of compound 2 upon incremental addition of CDNB (1mM) solution in DMF

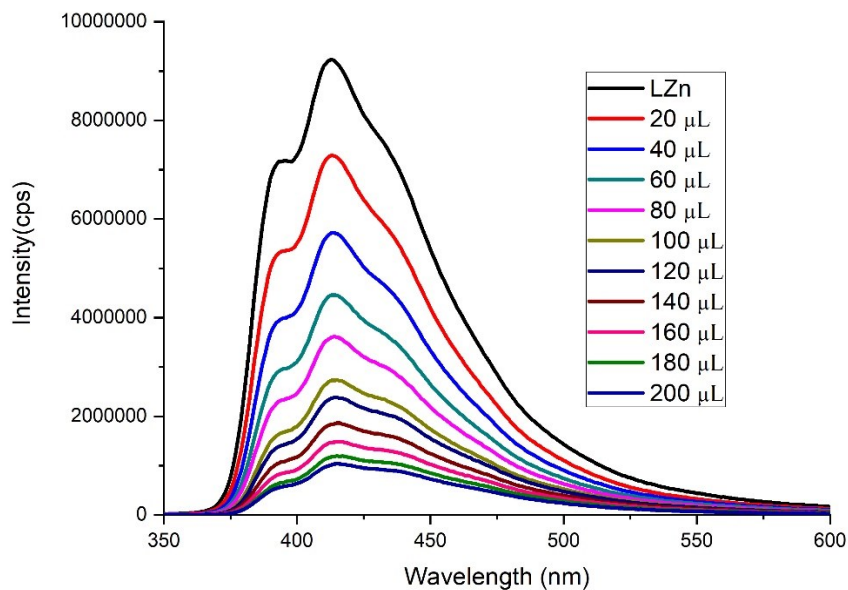

Figure S10: The change in fluorescence intensity of compound 2 upon incremental addition of 2,4-DNPH (1mM) solution in DMF

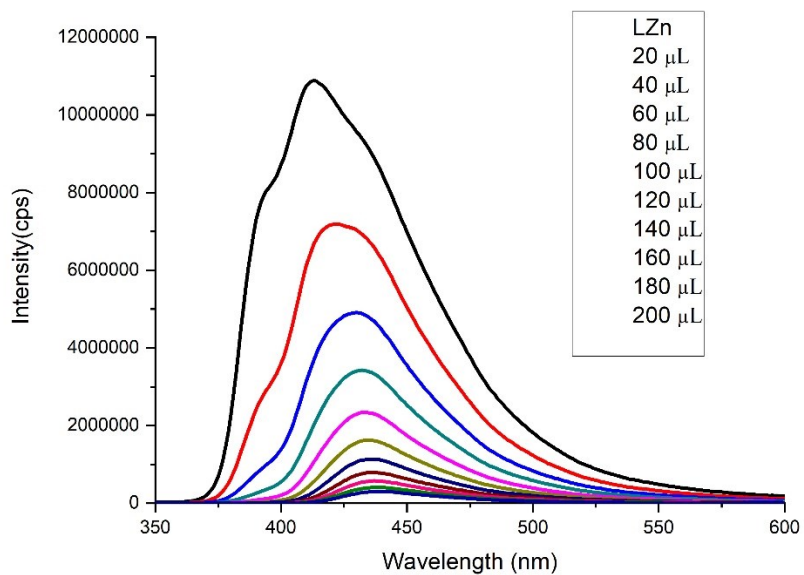

Figure S11: The change in fluorescence intensity of compound 2 upon incremental addition of 4-NA (1mM) solution in DMF

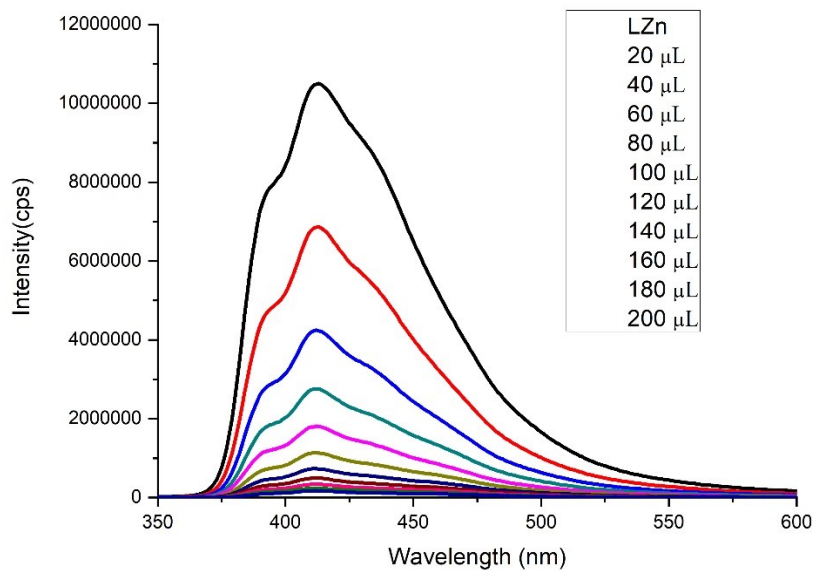

Figure S12: The change in fluorescence intensity of compound 2 upon incremental addition of 1-NP (1mM) solution in DMF

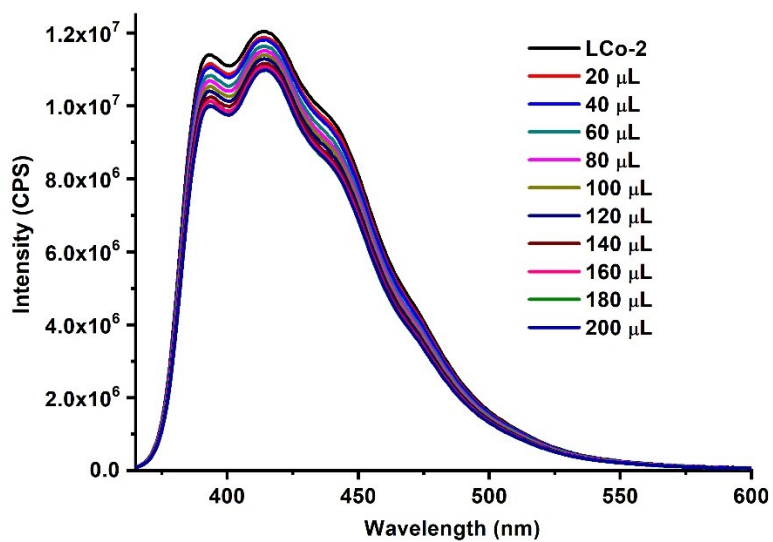

Figure S13: The change in fluorescence intensity of compound 3 upon incremental addition of 1,2-DNB (1mM) solution in DMF

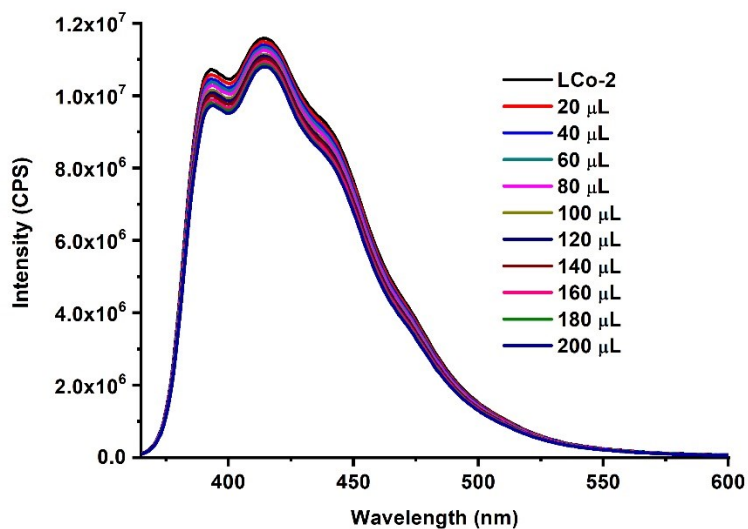

Figure S14: The change in fluorescence intensity of compound 3 upon incremental addition of 1,3-DNB (1mM) solution in DMF

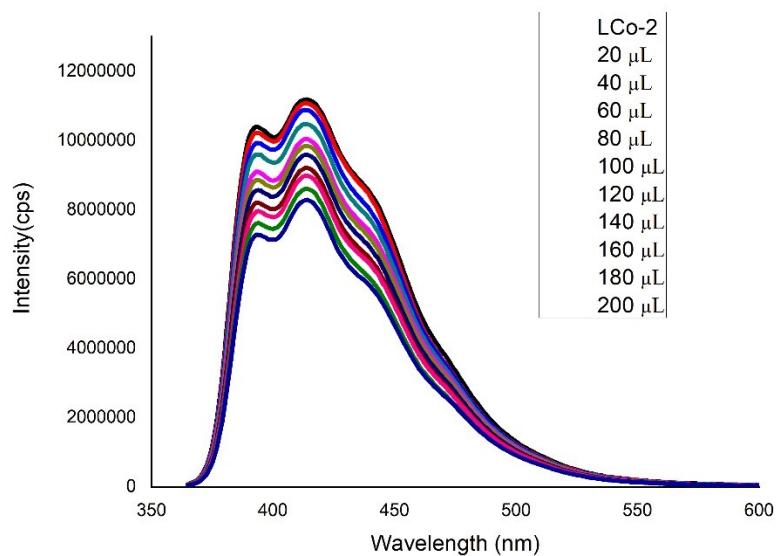

Figure S15: The change in fluorescence intensity of compound 3 upon incremental addition of CDNB (1mM) solution in DMF

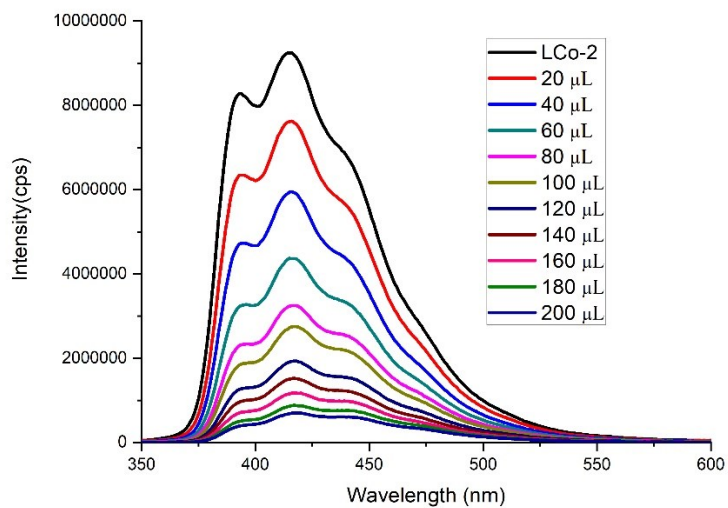

Figure S16: The change in fluorescence intensity of compound 3 upon incremental addition of 2,4-DNP (1mM) solution in DMF

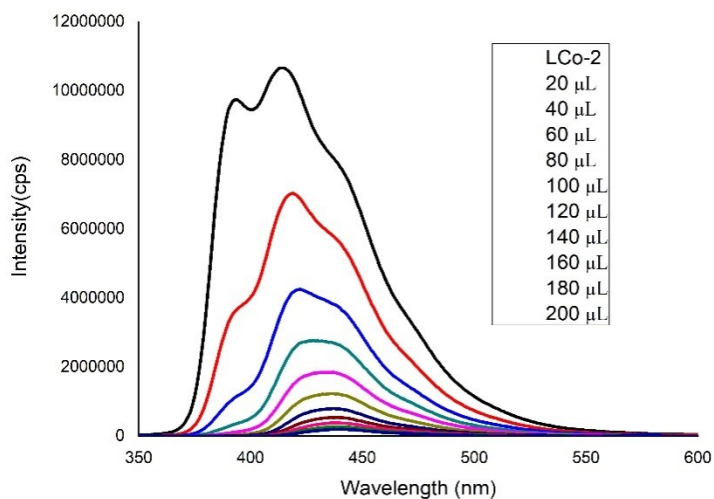

Figure S17: The change in fluorescence intensity of compound 3 upon incremental addition of 4-NA (1mM) solution in DMF

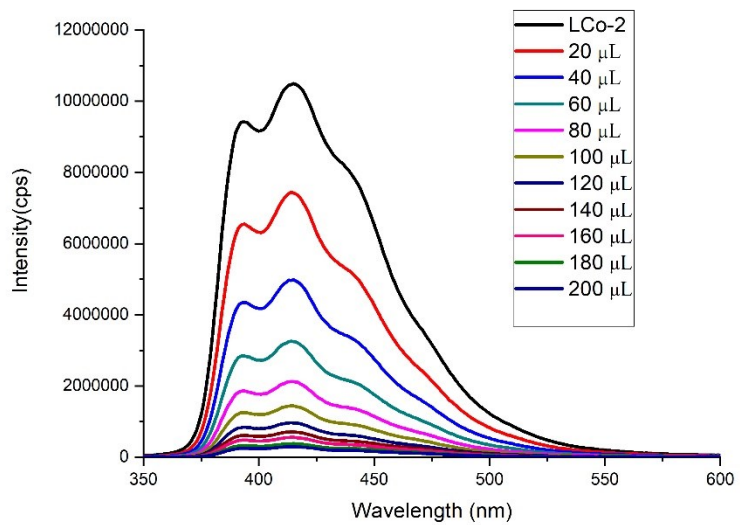

Figure S18: The change in fluorescence intensity of compound 3 upon incremental addition of 1-NP (1mM) solution in DMF
